# Supplementary material for: Flow Chamber System for the Statistical Evaluation of Bacterial Colonization on Materials
Source: Materials (Basel). 2016 Sep 10;9(9):770. doi: 10.3390/ma9090770 (PMC5457037; doi:10.3390/ma9090770)
Supplement: Supplementary file 1 [file materials-09-00770-s001.zip › materials-143199-supplementary-1/BAM.gmic]

#@gmic
#
#  File        : BAMs.gmic
#                ( G'MIC command file )
#

#@gmic :: BAMs about
#
cli_start : -if {$_version<172} 
  -error[] "Wrong version of gmic: "$_version"! Script BAMs.gmic needs at least 172" 
  -else -about ,0,0 -endif

#@gmic about : _file($_path_user),_update(1),_BAMs_update(0)
#@gmic : Print gmic version prerelease date default ($_path_user) and 
#@gmic : update gmic files if _update is true and BAM_update if true
#@gmic : To control the actual state of $_path_user default file: BAMs.gmic/2016-06-28 
#@gmic : New BAMs.gmic file will be copied to %APPDATA%\Roaming\user.gmic (Windows) or to $HOME/.gmic (Unix)
#@gmic : EX.: -about ,0
#@gmic : Author : <i>KaRo</i>. Latest update : <i>2016-06-28</i>.
about : -skip "${1=$_path_user} && ${2=1} && ${3=0}" 
   -check ($_version<1000" && "$_version>=172)
   -v - -if $2 -v + -up -v - -endif -if $3 -v + -BAMs_update -v - -endif
   -if {$_version<172} -_u $1 -echo_stdout "\n G'MIC "$_version" "$_prerelease":"${}" "${-padint\ {date(2,$1)},2}.${-padint\ {date(1,$1)},2}.{date(0,$1)}" "${-padint\ {date(4,$1)},2}.${-padint\ {date(5,$1)},2}" (about:[BAMs.gmic]/2016-06-28)" -v + 
   -else -u {/$1} -echo_stdout "\n G'MIC "$_version" "$_prerelease":"${}" "${-padint\ {date(2,$1)},2}.${-padint\ {date(1,$1)},2}.{date(0,$1)}" "${-padint\ {date(4,$1)},2}.${-padint\ {date(5,$1)},2}" (about:[BAMs.gmic]/2016-06-28)" -v +
   -endif
#@gmic BAMs_update
#@gmic : Update commands from the latest BAMs definition file on KaRo server.
#@gmic : This requires an active Internet connection and an access to the external
#@gmic : tools 'curl' or 'wget'.
#@gmic : Once the update has been downloaded, running 'gmic' makes it use automatically.
BAMs_update :
-_$0
_BAMs_update :
-e[0--3] "Update commands from the latest definition file on the KaRo server."
-v -
#out=${-path_rc}cli_update$_version.gmic
-l[] raw:http://karo03.bplaced.de/tmp1/gmic/BAMs.gmic,uchar
-if {$_version<172} -if {h>7" && "{${-head\ 6}'=='{'"#@gmic"'}}} -o raw:$_path_user,char -endif
-else -if {h>7" && "same([{^}],'#@gmic',6)} -o raw:$_path_user,char -endif -endif -rm
-onfail -error[0--3] "Command '-update' : Unreachable BAMs update file."
-endl
-m $out
-v +

#@gmic :: BAM Functions OverView Images

#@gmic fh_ue_test : _filename_overview, _segmentation_method(triangle), _inversion(0), _width(1280), height(960), _old_display(1), _pix_width(3)
#@gmic : Display overview for visual inspection
#@gmic : 1 Read _filename_overview, 
#@gmic : 2 Read {_filename_overview}_{segmentation_method}.tif
#@gmic : 3 _Display overview without(0)/with(1) _inversion
#@gmic : 4 _width(1280)
#@gmic : 5 _height(960)
#@gmic : 6 _old_display(1)
#@gmic : 7 _pix_width(3)
#@gmic : Left click in overview shows tile window 
#@gmic : ^S sets the status to changed, hence tke _ok file will be written.
#@gmic : ^I prints features RefA,ARed,AGreen,ARefz,NRefz,MeanRefz,SDRefz !!Will last some time!!
#@gmic : Q/esc in overview exits and writes _ok mask image (if there were changes).
#@gmic : Reference Mask handling. Mask is stored in Blue channel value 1
#@gmic :   Right click or ^D in overview window deletes tile
#@gmic :   Left click inside tile window closes the window,
#@gmic :   Right click or ^D inside tile window deletes and closes tile window
#@gmic :   ^A apply interactive threshold in tile window
#@gmic :     in contrast to all other operations this is applied to the red channel no 0,
#@gmic :     without change to channel no 1 and 2
#@gmic :     move cursor into the image, press AND hold left button and release after adjusting the threshold
#@gmic :   ^Y (rectangle) ^X (ellipse) inside tile window activates selection and deletes the selection
#@gmic :   ^Z (rectangle) inside tile window activates selection for a zoom window
#@gmic :     move to start point edge (rectangle) or center (ellipse)
#@gmic :     and draw with left pressed to size
#@gmic :   Right click or ^D inside zoom window deletes rectangle, similar ^Y and closes zoom window
#@gmic : Reference Cell handling. Masks are stored in Blue channel value 3
#@gmic :   SHIFTLEFT left click prints position and size of object under cursor
#@gmic :   SHIFTLEFT CTRLLEFT left click inverts marker of object under cursor
#@gmic :   ^U set reference cell under cursor
#@gmic :   ^R set similar (selected size +- _pix_width) reference cells to the one under cursor (only subimage)
#@gmic :   ^V set similar (selected size +- _pix_width) reference cells to the one under cursor 
#@gmic :    !!Will last some time!! Disappearing cursor shows a hit
#@gmic :   ^L delete all reference cells (!!Best to restart for saving)
fh_ue_test : -skip "${2=triangle} ${3=0} ${4=1280} ${5=960} ${6=1} ${7=3}" 
  -check ($_version<1000" && "$_version>=167)" || "($_version>1000" && "$_version>=1661) -v -
   swd=$7
#  -if {$6==0} -_fh_ue_test_init ${1-5} -else -_fh_ue_test_init_ ${1-5} -endif
  -_fh_ue_test_init_ ${1-5}
  _change=0
  na=${} -if {narg($na)>1} -rm -w 0 -v + -return 
  -else 
    wue={-2,w} nw={$wue/$4} hue={-2,h} nh={$hue/$5} change=0
	-l[-2,-1] -w1[0] ${-fitscreen\ {w},{h},{d}},-1,-1,$na dnum=0 del=" " -u $del
    -do -wait 40
# Links Klick im Hauptfenster(1) -> Unterbildfenster oeffnen
      -if {({*1,b}==1)&&({*1,x}>=0)&&({*1,y}>=0)}
	    -k[0,1]    # falls noch Unterbilder offen sind!
        x={{*1,x}/{*1,w}*$wue} y={{*1,y}/{*1,h}*$hue} x0={$x-$x%$4} y0={$y-$y%$5} -w0 0
        nu={$y0/$5*$nw+$x0/$4} --crop[0] $x0,$y0,{$x0+$4-1},{$y0+$5-1} 
        -w0[-1] -1,-1,-1,-1,$na": "{$nu+1} -wait -1
      -endif
# Links Klick im Unterfenster(0) -> Unterbildfenster schliessen
      -if {({*,b}==1)&&!{*,SHIFTLEFT}&&!{*,CTRLLEFT}&&!{*,CTRLRIGHT}} -w0 0 -w1[0] -rm[-1] -wait -1 -endif
# Rechts Klick oder ^D im Unterfenster(0) -> Unterbild loeschen und schliessen
      -if {(({*,CTRLLEFT}||{*,CTRLRIGHT})&&{*,D})||({{*,b}==2}&&!{*,CTRLLEFT}&&!{*,CTRLRIGHT})} -cursor[1] 0
        -rectangle[0,1] $x0,$y0,{$x0+$4-1},{$y0+$5-1},1,0,0,0 
		-rectangle[0] $x0,$y0,{$x0+$4-1},{$y0+$5-1},1,0xFFFFFFFF,0,0,128
		_change=1
		-w1[0] -cursor[1] 1
        -w0 0  -rm[-1] -if {$dnum==0} del=$nu -else del=$del,$nu -endif -u $del dnum=$dnum+1 -wait -1 
      -endif
# Rechts Klick oder ^D im Zoomfenster(2) -> Zoombereich loeschen und Zoomfenster schliessen
      -if {(({*2,CTRLLEFT}" || "{*2,CTRLRIGHT})" && "{*2,D})" || "{{*2,b}==2}} -cursor[1] 0
		-rectangle[-1] {arg(1,$rt)},{arg(2,$rt)},{arg(4,$rt)},{arg(5,$rt)},1,0,0,0
		_change=1
		-w[-1] x1={arg(1,$rt)+$x0} y1={arg(2,$rt)+$y0} 
		x2={arg(4,$rt)-arg(1,$rt)+$x1} y2={arg(5,$rt)-arg(2,$rt)+$y1}
		-rectangle[0,1] $x1,$y1,$x2,$y2,1,0,0,0 
		-rectangle[0] $x1,$y1,{$x2-1},{$y2-1},1,0xFFFFFFFF,0,0,128
		-w2 0 -wait -1 
      -endif
# SHIFTLEFT CTRLLEFT links click in subimage Fenster -> Delete/mark object
      -if {{*,SHIFTLEFT}" && "{*,CTRLLEFT}" && "({*,b}==1)" && "({*,x}>=0)" && "({*,y}>=0)}
	    x={round({*,x}/{*,w}*w)} y={round({*,y}/{*,h}*h)} 
		R1={i($x,$y,0,0)} B1={i(#1,$x0+$x,$y0+$y,0,0)}
		-if {($R1!=0)&&($B1!=0)} -cursor 0 # object hit
		  -sh. 0 --label_fg. 0,0 -eq. {i($x,$y,0,0)} sz={is} 
		  (1,1,1;1,1,1;1,1,1) --dilate[-2] [-1] -rm.. 
		  -autocrop_coords. , rt=${} # dilated Box bestimmen
		  -crop[-1,-2] $rt --crop[-4] $rt -xor[-2] [-3] 
		  x2={arg(1,$rt)} y2={arg(2,$rt)} x3={arg(4,$rt)} y3={arg(5,$rt)}
		  -if {$B1==1}  # objekt markieren
		    -v + -e[] "Hit: "{$nu+1},$x,$y,$sz," set" -v - 
		    --crop[0,1] {$x2+$x0},{$y2+$y0},0,{$x3+$x0},{$y3+$y0},0
			-*[-5] 2 -+. [-5] -*[-4] 255 -sh.. 2 -or. [-5] -rm.
			-image[0] [-2],{$x2+$x0},{$y2+$y0}
			-image[1] [-1],{$x2+$x0},{$y2+$y0}
			-image[-7] [-2],$x2,$y2
			-rm[-1--6]
		  -elif {$B1==3} # object loeschen
		    -v + -e[] "Hit: "{$nu+1},$x,$y,$sz," del" -v - 
		    --crop[0,1] {$x2+$x0},{$y2+$y0},0,{$x3+$x0},{$y3+$y0},0
			-*[-5] 2 --[-1] [-5] -eq[-4] 0 -*[-2,-3] [-4]
			-image[0] [-2],{$x2+$x0},{$y2+$y0}
			-image[1] [-1],{$x2+$x0},{$y2+$y0}
			-image[-7] [-3],$x2,$y2
			-rm[-1--6]
		  -endif -w[-1] _change=1 -cursor 1
		-else -v + -e[] "Zut: "{$nu+1},$x,$y -v -
		-endif -wait -30
	  -endif
# ^U im Unterfenster -> gewaehltes Objekt markieren in Validitätsmask(3) und in View(Rand 256 blau)
      -if {({*,CTRLLEFT}" || "{*,CTRLRIGHT})" && "{*,U}} 
	    --select. 0 rt={^} -rm. -w2 0 -w. 
	    x={round(arg(1,$rt)/{*,w}*w)} y={round(arg(2,$rt)/{*,h}*h)} 
		R1={i($x,$y,0,0)} B1={i(#1,$x0+$x,$y0+$y,0,0)}
		-if {($R1!=0)&&($B1==1)} -cursor 0 # object hit
		  -sh. 0 --label_fg. 0,0 -eq. {i($x,$y,0,0)} sz={is} 
		  (1,1,1;1,1,1;1,1,1) --dilate[-2] [-1] -rm.. 
		  -autocrop_coords. , rt=${} # dilated Box bestimmen
		  -crop[-1,-2] $rt --crop[-4] $rt -xor[-2] [-3] 
		  x2={arg(1,$rt)} y2={arg(2,$rt)} x3={arg(4,$rt)} y3={arg(5,$rt)}
		  -if {$B1==1}  # objekt markieren
		    -v + -e[] "Hit: "{$nu+1},$x,$y,$sz," set" -v - 
		    --crop[0,1] {$x2+$x0},{$y2+$y0},0,{$x3+$x0},{$y3+$y0},0
			-*[-5] 2 -+. [-5] -*[-4] 255 -sh.. 2 -or. [-5] -rm.
			-image[0] [-2],{$x2+$x0},{$y2+$y0}
			-image[1] [-1],{$x2+$x0},{$y2+$y0}
			-image[-7] [-2],$x2,$y2
			-rm[-1--6]
		  -elif {$B1==3} # object loeschen
		    -v + -e[] "Hit: "{$nu+1},$x,$y,$sz," del" -v - 
		    --crop[0,1] {$x2+$x0},{$y2+$y0},0,{$x3+$x0},{$y3+$y0},0
			-*[-5] 2 --[-1] [-5] -eq[-4] 0 -*[-2,-3] [-4]
			-image[0] [-2],{$x2+$x0},{$y2+$y0}
			-image[1] [-1],{$x2+$x0},{$y2+$y0}
			-image[-7] [-3],$x2,$y2
			-rm[-1--6]
		  -endif -w[-1] _change=1 -cursor 1
		-elif {($R1!=0)&&($B1==3)} -v + -e[] "Hit: "{$nu+1},$x,$y -v - 
		-else -v + -e[] "Zut: "{$nu+1},$x,$y -v -
		-endif -wait -30
      -endif
# ^R im Unterfenster -> gewaehltes Objekt markieren in Validitaetsmask(3) und in View(Rand 256 blau)
#    sowie alle gleicher Groesse im Intervall Groesse +- $7 im Unterbild
#    Unterfenster wird geschlossen
      -if {({*,CTRLLEFT}" || "{*,CTRLRIGHT})" && "{*,R}} 
	    --select. 0 rt={^} -rm. -w2 0 -w.  
	    x1={round(arg(1,$rt)/{*,w}*w)} y1={round(arg(2,$rt)/{*,h}*h)} 
		R1={i($x1,$y1,0,0)} G1={i($x1,$y1,0,1)} B1={i(#1,$x0+$x1,$y0+$y1,0,0)} 
		-if {($R1!=0)&&($B1!=0)} -cursor 0
		  -sh. 0 --label_fg. 0,0
		  --eq. {i($x1,$y1,0,0)} sz={is} -rm.  # Grösse feststellen
		  -v + -e[] {b},$x1,$y1"["{$sz-$swd}".."$sz".."{$sz+$swd}"]" -v -
		  --histogram. {iM+1},0,{iM} -=. 0,0 
		  --ge. {$sz-$swd} -le.. {$sz+$swd} -and[-1,-2] -*. 2 -map.. [-1] -rm[-1,-3] 
		  --crop... $x0,$y0,{$x0+$4-1},{$y0+$5-1} -or. [-2] -image[-4] [-1],$x0,$y0 -rm.
		  --crop[-4] $x0,$y0,{$x0+$4-1},{$y0+$5-1} -sh. 2 
		  (1,1,1;1,1,1;1,1,1) --dilate[-4] [-1] -rm.. -xor[-4,-1] -*... 127 -or. [-3] -rm. 
		  -image[-5] [-1],$x0,$y0 -rm[-3,-2]
		  _change=1 -cursor 1 -w1[0] -w. 
		-endif
		-wait -50
      -endif
# ^V im Unterfenster -> gewaehltes Objekt markieren in Validitaetsmask(3) und in View(Rand 256 blau)
#    und alle gleicher Groesse im Intervall Groesse +- $7 inder Übersicht
#    Unterfenster wird geschlossen
      -if {({*,CTRLLEFT}" || "{*,CTRLRIGHT})" && "{*,V}} 
	    --select. 0 rt={^} -rm. -w2 0 -w.  
	    x1={round(arg(1,$rt)/{*,w}*w)} y1={round(arg(2,$rt)/{*,h}*h)} 
		R1={i($x1,$y1,0,0)} G1={i($x1,$y1,0,1)} B1={i(#1,$x0+$x1,$y0+$y1,0,0)} 
		-if {($R1!=0)&&($B1!=0)} -cursor 0
		  -sh. 0 --label_fg. 0,0
		  --eq. {i($x1,$y1,0,0)} sz={is} -rm[-1--3] # Grösse feststellen
		  -v + -e[] {b},$x1,$y1"["{$sz-$swd}".."$sz".."{$sz+$swd}"]" -v - -w0 0
		  -sh... 0 --label_fg. 0,0 --histogram. {iM+1},0,{iM} -=. 0,0
		  --ge. {$sz-$swd} -le.. {$sz+$swd} -and[-1,-2] -*. 2 -map.. [-1] -rm[-1,-3] 
		  -or... [-1] 
		  -sh[-4] 2  
		  (1,1,1;1,1,1;1,1,1) --dilate[-3] [-1] -rm.. -xor[-3,-1] -*.. 127 -or. [-2] -rm[-1,-2]
		  _change=1 -cursor 1 -w1[0] -rm. 
		-endif
		-wait -50 
      -endif
# ^Z im Unterfenster (no rm)(0) -> Zoomfenster oeffnen
      -if {(({*,CTRLLEFT}" || "{*,CTRLRIGHT})" && "{*,Z})} 
	    --select. 2 rt={^} -rm. -w2 0 
		--crop. {arg(1,$rt)},{arg(2,$rt)},{arg(4,$rt)},{arg(5,$rt)}
		 x1={arg(1,$rt)+$x0} y1={arg(2,$rt)+$y0} x2={arg(4,$rt)-arg(1,$rt)+$x1} y2={arg(5,$rt)-arg(2,$rt)+$y1}
		-w2[-1] ${-fitscreen\ {w*4},{h*4},{d}},-1,-1,{{*,u}-w*4},{{*,v}-20-h*4},"Zoom:"$na -rm[-1] 
		-wait -50 
      -endif
# ^Y im Unterfenster (no rm)(0) -> Rechteck ziehen und loeschen
      -if {(({*,CTRLLEFT}" || "{*,CTRLRIGHT})" && "{*,Y})} 
	    --select[-1] 2 rt={^} -rm[-1]
		-rectangle[-1] {arg(1,$rt)},{arg(2,$rt)},{arg(4,$rt)},{arg(5,$rt)},1,0,0,0
		-w[-1] x1={arg(1,$rt)+$x0} y1={arg(2,$rt)+$y0} 
		x2={arg(4,$rt)-arg(1,$rt)+$x1} y2={arg(5,$rt)-arg(2,$rt)+$y1}
		-rectangle[0,1] $x1,$y1,$x2,$y2,1,0,0,0 
		-rectangle[0] $x1,$y1,{$x2-1},{$y2-1},1,0xFFFFFFFF,0,0,128
		_change=1
		-wait -1 
      -endif
# ^X im Unterfenster (no rm)(0) -> Ellipse ziehen und loeschen
      -if {(({*,CTRLLEFT}" || "{*,CTRLRIGHT})" && "{*,X})} 
	    --select[-1] 3 rt={^} -rm[-1]
		-ellipse[-1] {arg(1,$rt)},{arg(2,$rt)},{arg(4,$rt)},{arg(5,$rt)},0,1,0,0,0
		-w[-1] x1={arg(1,$rt)+$x0} y1={arg(2,$rt)+$y0}
		-ellipse[0,1] $x1,$y1,{arg(4,$rt)},{arg(5,$rt)},0,1,0,0,0 -wait -1 
		-ellipse[0] $x1,$y1,{arg(4,$rt)},{arg(5,$rt)},0,1,0xFFFFFFFF,0,0,128 -wait -1 
		_change=1
      -endif
# ^I im overview Fenster -> Print features
      -if {({*1,CTRLLEFT}" || "{*1,CTRLRIGHT})" && "{*1,I}} 
	    -cursor 0 -_ue_eval_1[0,1]
		-v + -e[] {b},$_sa2,$_sa0,$_sa1,$_sa3,$_sa4,{_$_sa5},{_$_sa6},$_change -v - 
		-wait -10 -cursor 1
	  -endif
# ^I im Unterfenster -> Print features
      -if {({*,CTRLLEFT}" || "{*,CTRLRIGHT})" && "{*,I}} 
	    -cursor 0  --crop[0,1] $x0,$y0,{$x0+$4-1},{$y0+$5-1} -_ue_eval_1[-2,-1] -rm[-2,-1]
		-v + -e[] {b},$_sa2,$_sa0,$_sa1,$_sa3,$_sa4,{_$_sa5},{_$_sa6},$_change -v - 
		-wait -10 -cursor 1
	  -endif
# SHIFTLEFT Links click in subimage Fenster -> Print object features
      -if {{*,SHIFTLEFT}&&({*,CTRLLEFT}==0)&&({*,b}==1)&&({*,x}>=0)&&({*,y}>=0)}
	    x={round({*,x}/{*,w}*w)} y={round({*,y}/{*,h}*h)} 
		R1={i($x,$y,0,0)} B1={i(#1,$x0+$x,$y0+$y,0,0)}
		-if {($R1!=0)&&($B1!=0)} -cursor 0
		  -sh. 0 --label_fg. 0,0
		  -eq. {i($x,$y,0,0)} sz={is} -rm[-1--2] # Grösse feststellen
		  -v + -e[] "Hit: "{$nu+1},$x,$y,$sz -v - -cursor 1
		-else -v + -e[] "Zut: "{$nu+1},$x,$y -v -
		-endif -wait -30
	  -endif
# ^L in irgendeinem Fenster (overview oder subimage) -> Delete Reference cells
      -if {(({*1,CTRLLEFT}||{*1,CTRLRIGHT})&&{*1,L})||(({*,CTRLLEFT}||{*,CTRLRIGHT})&&{*,L})} -wait -1
	    -if {$!>2} -rm. -w 0 -endif 
		-neq. 0
		-sh.. 2 --neq. 255 -*[-1,-2] -rm.
		_change=1 -w1[-2] -wait -1
	  -endif
# ^A im Unterfenster (no rm) (0) -> Interaktive Schwelle starten
      -if {(({*,CTRLLEFT}" || "{*,CTRLRIGHT})" && "{*,A})} 
	    -sh. 2 --threshold. -rm.. -cursor 0
		-sh[0] 0 mx={iM#-1} -*.. $mx -image. [-2],$x0,$y0 -rm. 
		_change=1
		-rm. -w1[0] -cursor 1 -wait -1 
      -endif
# Rechts Klick oder ^D im Hauptfenster (no rm)(1) -> gewaehltes Unterbild loeschen
      -if {(({*1,CTRLLEFT}" || "{*1,CTRLRIGHT})" && "{*1,D})" || "{{*1,b}==2}} -cursor 0
  	    x={{*1,x}/{*1,w}*$wue} y={{*1,y}/{*1,h}*$hue} x0={$x-$x%$4} y0={$y-$y%$5} nu={$y0/$5*15+$x0/$4}
        -rectangle[0,1] $x0,$y0,{$x0+$4-1},{$y0+$5-1},1,0,0,0 
		-rectangle[0] $x0,$y0,{$x0+$4-1},{$y0+$5-1},1,0xFFFFFFFF,0,0,128
		_change=1
		-w1[0] -cursor 1
        -if {$dnum==0} del=$nu -else del=$del,$nu -endif -u $del dnum=$dnum+1 -wait -1 
      -endif
# ^S im Hauptfenster(1) -> Bild als veraendert markieren
      -if {({*1,CTRLLEFT}" || "{*1,CTRLRIGHT})" && "{*1,S}} 
		_change=1 -wait -1
      -endif
# Links Klick oder ESC oder Q im Zoomfenster oder closed Hauptfenster (2) -> Exit
      -if {{*2,ESC}" || "{*2,Q}" || "{*1}==0" || "{*2,b}==1} -w2 0 -wait -1 -endif
# ESC oder Q oder Close im Hauptfenster (1) -> Exit
      -if {{*1}==0" || "{*1,ESC}" || "{*1,Q}} -w1 0 -w2 0 -k[0,1] -wait -1 -break -endif
    -while 1 -endl
	-if {$!>3} -echo_stdout "Remaining images "{$!-3}"!" -endif
	-k[0-2]  # [0] _ok, [1] View, [2] ValidityMask (= sh[0] 2)
	-if $_change  # transfer red+green channel from View to _ok image
	  -sh[1] 0,1 -neq. 0 -sh[0] 0,1 -f. [-2] 
	  -rm[-1,-2]
	-endif
    --neq. 0 -*[-4,-1] # multiply validity mask with _ok
	-sh... 2 -f. [-2]  # copy validity to _ok ch 2 (for cell markers eq 3)
    -rm[-1--3] -l. -repeat 3 -sh. $> --neq. 0 sa$>={is#-1} -rm[-1,-2] -done -endl
    -echo_stdout "\n"$na,$sa2,$sa0,$sa1 #,${} 
    -if $_change -if {$_version<172} -_u {-1,f}${na}"_"$2"_ok.tif" -else -u {/{-1,f}${na}"_"$2"_ok.tif"} -endif
	  -echo_stdout "Write "${} 
	  -o {-1,f}${na}_$2_ok.tif,uchar,lzw -endif
	-rm
  -endif

#@gmic _fh_ue_test_init_1 : _filename_overview, _segmentation_method(triangle), _inversion(0)
#@gmic : Prepare display for visual inspection, 
#@gmic : returning rgb image with masks in R,G and B and 
#@gmic : returning rgb image with blended masks in R,G, B and intensities in B and 
#@gmic : separate validity mask (due to empty images in overview)
#@gmic : Read _filename_overview, read {_filename_overview}_{segmentation_method}.tif
#@gmic : Display overview without(0)/with(1) _inversion
_fh_ue_test_init_1 : -skip "${2=triangle} ${3=0} ${4=1280} ${5=960}" -v -
  -i $1 na={b} -u 1 
  -if {f}${na}_$2_ok.tif -alert[] fh_ue_test,$na\ already\ tested,Skip,Reject,Show,Continue,Quit
    -if {${}==0} -u $na,${} -rm -v + -return  # -> Skip
    -elif {${}==4} -rm -quit  # -> Quit
    -elif {${}==2||${}==3} -i {f}${na}_$2_ok.tif  # -> Show oder Continue
      -if {${}==2}  # -> Show
        -w1[-1] ${-fitscreen\ {w},{h},{d}},-1,-1,$na 
    	-alert[] fh_ue_test,$na\ already\ tested,Skip,Reject,Continue -w1 0
		-if {${}==0} -u $na,${} -rm -v + -return  # -> Skip
		-elif {${}==1} -rm[-1] -endif  # -> Reject (ok wird gel�scht) oder Skip
      -else -u 3 -endif
    -endif -endif
  -if {$!==1} -i {f}${na}_$2.tif -s[-1] c -if {is==0} -rm[-1] -_fh_ue_test_zero[-3] $4,$5,1 -rv[-3,-2] -rv[-2,-1] -endif
#	Nur ein Bild -> Uebersicht wird daraus erzeugt
  -else -s[-1] c -endif  #  -> ok Bild wird benutzt
  [-1] -a[-4--2] c -neq[-2] 0 [-2] -mv[-1] 0  -apply_gamma[1] 2.5 -n[1,2] 0,255
  -if {$3!=0} -negative[1] -endif
  -blend[1,2] negation
  -u $na -v +

#@gmic _fh_ue_test_init : _filename_overview, _segmentation_method(triangle), _inversion(0)
#@gmic : Prepare display for visual inspection without border generation, 
#@gmic : returning rgb image with masks in R,G and B (_ok image), 
#@gmic : image with border masks in R,G, B and intensities in B and 
#@gmic : separate validity mask (due to empty images in overview)
#@gmic : Read _filename_overview, read {_filename_overview}_{segmentation_method}.tif
#@gmic : Display overview without(0)/with(1) _inversion
_fh_ue_test_init : -skip "${2=triangle} ${3=0} ${4=1280} ${5=960}" -v -
  -i $1 na={b} -u 1 
  -if {f}${na}_$2_ok.tif -alert[] fh_ue_test,$na\ already\ tested,Skip,Reject,Show,Continue,Quit
    -if {${}==0} -u $na,${} -rm -v + -return 
    -elif {${}==4} -rm -quit 
    -elif {${}==2||${}==3} -i {f}${na}_$2_ok.tif 
      -if {${}==2} 
        -w1[-1] ${-fitscreen\ {w},{h},{d}},-1,-1,$na 
    	-alert[] fh_ue_test,$na\ already\ tested,Skip,Reject,Continue -w1 0
		-if {${}==0} -u $na,${} -rm -v + -return 
		-elif {${}==1} -rm[-1] -endif
      -else -u 3 -endif
    -endif -endif
  -if {$!==1} -i {f}${na}_$2.tif -s[-1] c -if {is==0} -rm[-1] -_fh_ue_test_zero[-3] $4,$5,1 -rv[-3,-2] -rv[-2,-1] -endif
  -else -s[-1] c -endif 
  -neq[-2,-3] 0 [-1] --a[-2--4] c 
  --apply_parallel[-5--3] "-dilate 3" -xor[-1,-6] -xor[-1,-6] -xor[-1,-6] -*[-3--5] 255
  -c[-6] 0,{{-4,ia}+5*sqrt({-4,iv})} -n[-6] 0,127 -if {$3!=0} -negative[-6] -endif
  -or[-3--5] [-6] -rm[-6] -a[-5--3] c -rv[-1,-2] -rv[-2,-3] -u $na -v + 

#@gmic _fh_ue_test_init_ : _filename_overview, _segmentation_method(triangle), _inversion(0)
#@gmic : Prepare display for visual inspection without border generation, 
#@gmic : returning rgb image with masks in R,G and B and 
#@gmic : returning rgb image with masks in R,G, B and intensities in B and 
#@gmic : separate validity mask (due to empty images in overview)
#@gmic : Read _filename_overview, read {_filename_overview}_{segmentation_method}.tif
#@gmic : Display overview without(0)/with(1) _inversion
_fh_ue_test_init_ : -skip "${2=triangle} ${3=0} ${4=1280} ${5=960}" -v -
  -i $1 na={b} -u 1 reuse=0
  -if {f}${na}_$2_ok.tif -alert[] fh_ue_test,$na\ already\ tested,Skip,Reject,Show,Continue,Quit -endif
  -if {${}==0} -u $na,${} -rm -v + -return 
  -elif {${}==2||${}==3} -i {f}${na}_$2_ok.tif 
    -if {${}==2} 
      -w1[-1] ${-fitscreen\ {w},{h},{d}},-1,-1,$na 
	  -alert[] fh_ue_test,$na\ already\ tested,Skip,Reject,Continue -w1 0
	-else -u 2 -endif
    -if {${}==0} -u $na,${} -rm -v + -return 
    -elif {${}==1} -rm[-1] 
    -else reuse=1 -endif
  -elif {${}==4} -rm -quit -endif
  -if {$reuse==0} -i {f}${na}_$2.tif -c[-1] 0,63 -s[-1] c -else -s[-1] c -*[-2,-3] 63 -endif
  -if {is==0} -_fh_ue_test_zero[-4] $4,$5,1 -f[-1] [-4] -rm[-4] -endif
#  -c[-4] 0,{{-4,ia}+2*sqrt({-4,iv})} -n[-4] 0,255 -if {$3!=0} -negative[-4] -endif
   -apply_gamma[-4] 2.0 -c[-4] 0,200 -n[-4] 0,255 -if {$3!=0} -negative[-4] -endif
# Ergänzung für Referenzzellen in Blau
  -mv[-4] -1 -a[-4--2] c --neq. 0 -*[-3,-1] -i [-2] -sh[-1] 2,2 -f[-1] [-3] -rm[-1] -mv[-1] -3 
  -sh... 0,1 -neq. 0 -rm. 
# Referenzzellen einblenden
  --and. 2 -if {is} --dilate. 3 -xor[-2,-1] -*. 127 -sh... 2 -or[-1] [-2] -rm. -endif -rm.
  -u $na -v +

#@gmic _fh_ue_test_zero : _width(1280), _height(960), _value(1)
#@gmic : Set marker _value for zero subimages
_fh_ue_test_zero : -skip "${1=1280} ${2=960} ${3=1}" -v -
  nx={w/$1} ny={h/$2} 
  -l[-1] --split_tiles[0] $nx,$ny n0=0
  -repeat {$!-1} -l[{$>+1}] 
    -if {is==0} -f[0] 0 -if {$n0==0} -u $> -else -u ${},$> -endif n0=$n0+1
	-else -f[0] $3 -endif -endl -done 
  -append_tiles[1--1] $nx,$ny -endl -v +

#@gmic _fh_ue_set : _width(1280), _height(960), _value(0), i1, ... ,in
#@gmic : Preparation of _ok file by hand for many rejections (experts only!)
#@gmic : Ex.: gmic BAM.gmic V23_Z4_D1_triangle.tif [-1] -_fh_ue_set[-1] ,,0,"86-104" -sh[-1] 2,2 -_fh_ue_set[-1] ,,128,"^86-104" -rm[-1] -k[-1] -/ 128 -o {0,f}{0,b}_ok.tif,uchar,lzw
_fh_ue_set : -skip "${1=1280} ${2=960} ${3=0}" -v -
  nn=${4--1}
  nx={w/$1} ny={h/$2}
  -l[-1] -split_tiles $nx,$ny 
  -f[$nn] $3  
  -append_tiles $nx,$ny -endl -v +

#@gmic :: BAM Functions Groups of Images

#@gmic ls_x_files : cmd,filepattern
#@gmic : External command on a list of files
#@gmic : Ex.: -ls_x_files "bfconvert -overwrite -bigtiff",BC03079/V23_Z1_A\*.nd2
ls_x_files : -check ($_version<1000" && "$_version>=167)" || "($_version>1000" && "$_version>=1661) 
  -v -
  files=${"-files 3,$2"}
  -repeat {narg($files)}
    -arg {1+$>},$files
	na=${}
	-x "$1 "$na" "$na.tif
  -done -v +

#@gmic ls_fh_ue_test : filepattern, _segmentation_method(triangle), _inversion(0), _width(1280), height(960)
#@gmic : fh_ue_test on a list of files
ls_fh_ue_test :  -skip "${2=triangle} ${3=0} ${4=1280} ${5=960}" 
  -check ($_version<1000" && "$_version>=167)" || "($_version>1000" && "$_version>=1661)
  -v -
  files=${"-files 3,$1"}
  -repeat {narg($files)}
    -arg {1+$>},$files
	na=${} -rm
	-fh_ue_test $na,${2-5}
  -done -v +

#@gmic ls_fh_ue_eval : filepattern
#@gmic : Evaluate a group of _ok.tif files
ls_fh_ue_eval : -check ($_version<1000" && "$_version>=167)" || "($_version>1000" && "$_version>=1661) 
  -v - -apply_files "-fh_ue_eval","$*" -v +

#@gmic ls_fh_ue_eval_p : filepattern
#@gmic : Evaluate a group of _ok.tif files
ls_fh_ue_eval_p : -check ($_version<1000" && "$_version>=167)" || "($_version>1000" && "$_version>=1661) 
  -v - -apply_files "-fh_ue_eval_p","$*" -v +

#@gmic ls_fh_ue_eval_p1 : filepattern
#@gmic : Evaluate a group of _ok.tif files and write a resultfile _eval_p.cimgz
ls_fh_ue_eval_p1 : -check ($_version<1000" && "$_version>=167)" || "($_version>1000" && "$_version>=1661) 
  -v - -apply_files "-fh_ue_eval_p ,,1","$*" -v +

#@gmic ls_fh_ue_eval_1 : filepattern, _width(1280), _height(960)
#@gmic : Evaluate a group of _ok.tif files
ls_fh_ue_eval_1 :  -skip "${2=1280} ${3=960}"   -check ($_version<1000" && "$_version>=167)" || "($_version>1000" && "$_version>=1661)
  -v - -apply_files "-fh_ue_eval_1 $2,$3","$1" -v +

#@gmic fh_ue_eval : 
#@gmic : Count segmented pixel
fh_ue_eval : -check ($_version<1000" && "$_version>=167)" || "($_version>1000" && "$_version>=1661) -v -
	--channels[-1] 2
	-_ue_eval_1[-2,-1] -rm.
    -echo_stdout {b},$_sa2,$_sa0,$_sa1,$_sa3,$_sa4,$_sa5,$_sa6 -rm -v +

#@gmic fh_ue_eval_1 : _width(1280), _height(960)
#@gmic : Count segmented pixel also per sub-image
fh_ue_eval_1 : -skip "${1=1280} ${2=960}" -check ($_version<1000" && "$_version>=167)" || "($_version>1000" && "$_version>=1661) -v -
-l[0]
  na={b} ww={w} hh={h}
  --channels. 2 -_ue_eval_1[-2,-1] -rm.
  -echo_stdout $na,0,$_sa2,$_sa0,$_sa1,$_sa3,$_sa4,$_sa5,$_sa6
  -split_tiles[0] {$ww/$1},{$hh/$2} 
  -repeat $! -l[$>]
	--channels 2 -_ue_eval_1 -rm. 
    -echo_stdout $na,{$>+1},$_sa2,$_sa0,$_sa1,$_sa3,$_sa4,$_sa5,$_sa6
  -endl -done 
  -rm
-endl -v + 

#@gmic fh_ue_eval_p : _width(1280), _height(960), _cimgz(0)
#@gmic : Count segmented pixel also per sub-image and estimate particle statistics
fh_ue_eval_p : -skip "${1=1280} ${2=960} ${3=0}" -check ($_version<1000" && "$_version>=167)" || "($_version>1000" && "$_version>=1661) -v -
-l[0]
  na={b} ww={w} hh={h}
  -l[-1] --channels. 2 -_ue_eval_1[-2,-1] -rm. -endl
  -echo_stdout $na,0,$_sa2,$_sa0,$_sa1,$_sa3,$_sa4,$_sa5,$_sa6
  -split_tiles[0] {$ww/$1},{$hh/$2} nn1=$! -repeat $! -nm[$>] _{$>+1} -done
  -ap "ni={n} --channels. 2 -_ue_eval_1[-2,-1] -rm. __v${ni}=$_sa2\,$_sa0\,$_sa1,$_sa3,$_sa4,$_sa5,$_sa6" 
  -rm -repeat $nn1 
    -echo_stdout $na","{$>+1}","${__v_{$>+1}} 
    -if $3 ({$>+1},${__v_{$>+1}}) -endif
  -done -if $3 -a y -o {f}${na}_eval_p.cimgz -rm -endif
-endl -v + 

#@gmic _ue_eval_1 : 
#@gmic : Count segmented pixel and reference cells
#@gmic : Input View, Validity Mask 
#@gmic : _sa0 : Red area
#@gmic : _sa1 : Green area
#@gmic : _sa2 : Referencearea
#@gmic : _sa3 : Reference cell total area
#@gmic : _sa4 : Reference cell number
#@gmic : _sa5 : Reference cell mean area
#@gmic : _sa5 : Reference cell SD area
_ue_eval_1 : -v -
    --neq[0] 0 -sh. 0 -sh.. 1 --neq[1] 0 -*[-2,-3] [-1]
	_sa2={is#-1} _sa0={is#-3} _sa1={is#-2} -rm[-1--4]
	--eq[1] 3 _sa3={is#-1} 
	-if $_sa3 -label. _sa4={iM} 
	  -histogram. {iM},1,{iM} _sa5={ia} _sa6={sqrt(iv)} -rm. 
	-else _sa4=0 _sa5=0 _sa6=0 -rm. -endif -v +

#@gmic _ue_eval_2 : 
#@gmic : Count segmented pixel (Input _ok or segment file)
#@gmic : _sa0 : Red area
#@gmic : _sa1 : Green area
#@gmic : _sa2 : Reference area
_ue_eval_2 : -v -
    -sh[0] 0 -sh[0] 1 -neq[-1,-2] 0 -sh[0] 2 --neq. 0 -*[-4,-3] [-1] 
	_sa2={is#-1} _sa0={is#-4} _sa1={is#-3} -rm[-1--4] -v +

#@gmic :: BAM Functions Segmentation of Images

#@gmic fh_threshold : _thresh_method, _width, _height, _header
#@gmic : Meausure tile files and 
#@gmic : produce masks (bit7=one threshold,bit6=threshold per image,bit)
#@gmic : _thresh_method= triangle | otsu | yen | bgt | rats | fixnnn | intera
#@gmic : _width of tessel (1280)
#@gmic : _height of tessel (960)
#@gmic : _header (0)
#@gmic : intera method is applied only for the whole overview image!
#@gmic : fixnnn method is used to set threshold nnn !
#@gmic : Ex.: find . -name \*.pgm -exec gmic -v - {} -fh_threshold , -o {b}_triangle.tif,uchar,lzw >> DFZ6.txt ;
fh_threshold : -skip ${1=triangle},${2=1280},${3=960},${4=0} -v - 
-if {$4!=0} -echo_stdout "Name, No, Mean, SD, TotalA, A, Thresh" -endif 
-repeat $! -l[$>] 
  m1={ia} m2={sqrt(iv)} na={b} ww={w} hh={h} 
  --karo_threshold $1 th=${} 
  -echo_stdout $na",0,"$m1","$m2","{wh}","{is}","$th 
  -if {'"$1"'=='intera'} [1] -rm[0] -else 
    -split_tiles[0] -$2,-$3 
    -repeat {$!-1} -l[$>] 
      m1={ia} m2={sqrt(iv)} 
      -if {$m1!=0} 
        -karo_threshold $1 th=${} 
        -echo_stdout $na,{$>+1},$m1,$m2,{wh},{is},$th 
      -else 
        -f 254 th=0 
        -echo_stdout $na,{$>+1},$m1,0,0,0,$th 
      -endif 
    -endl -done 
    -append_tiles[0--2] {$ww/$2},{$hh/$3} 
  -endif 
  --f[0] 1 -and[0,1] 1 -<<[0,1] 7 -a c -nm $na 
-endl -done -v + 

#@gmic fh_threshold_p : _thresh_method, _width, _height, _header
#@gmic : Meausure tile files and 
#@gmic : produce masks (bit7=one threshold,bit6=threshold per image,bit)
#@gmic : (parallized version)
#@gmic : _thresh_method= triangle | otsu | yen | bgt | rats | fixnnn (triangle)
#@gmic : _width of tessel (1280)
#@gmic : _height of tessel (960)
#@gmic : _header (0)
#@gmic : Ex.: find . -name \*.pgm -exec gmic -v - {} -fh_threshold_p , -o {b}_triangle.tif,uchar,lzw >> DFZ6.txt \;
fh_threshold_p : -skip ${1=triangle},${2=1280},${3=960},${4=0} -v - 
-if {$4!=0} -echo_stdout "Name, No, Mean, SD, TotalA, A, Thresh\n" -endif
-repeat $! -l[$>]
  m1={ia} m2={sqrt(iv)} __na={b} ww={w} hh={h}
  --karo_threshold $1 th=${} 
  -echo_stdout $__na",0,"$m1","$m2","{wh}","{is}","$th
  -split_tiles[0] -$2,-$3 no={$!-1} -repeat $no -nm[$>] _{$>+1} -done  
  -ap[0--2] " \
m1={ia} m2={sqrt(iv)} ni={n} \
-if {$m1>0} -karo_threshold $1 -else -f 254 -u 0 -endif \
__v${ni}=$m1","$m2","{wh}","{is}","${} " 
  -append_tiles[0--2] {$ww/$2},{$hh/$3}
  -repeat $no -echo_stdout $__na","{$>+1}","${__v_{$>+1}} -done
  --f[0] 1 -and[0,1] 1 -<<[0,1] 7 -a c -nm $__na
-endl -done -v + 

#@gmic bc_threshold :  _thresh_method,_width,_height
#@gmic : Meausure tile files 
#@gmic : _thresh_method= triangle | otsu | yen | bgt | rats | fixnnn (triangle)
#@gmic : _width of tessel (1280)
#@gmic : _height of tessel (960)
bc_threshold : -skip "${1=triangle} ${2=1280} ${3=960}" -v - 
-repeat $! -l[$>]
  m1={ia} m2={sqrt(iv)} na={b} ww={w} hh={h}
  --karo_threshold $1 th=${} -echo_stdout $na,0,$m1,$m2,{wh},{is},$th -rm[-1]
  -split_tiles {$ww/$2},{$hh/$3} 
  -repeat $! -l[$>] 
    m1={ia} m2={sqrt(iv)} -karo_threshold $1 th=${} 
	-echo_stdout $na,{$>+1},$m1,$m2,{wh},{is},$th   -endl -done 
  -append_tiles {$ww/$2},{$hh/$3} -rm
-endl -done -v + 

#@gmic :: BAM Utilities for Probe arrangement

#@gmic bc_arrange_probe : _size(50%)
#@gmic : Arrange list of eight images 0-7 as FM Probe (2 per column)
#@gmic : with resize by _size (default 50%)
#@gmic : Ex: -repeat 8 256,128 -text[-1] $>,10,10,114,1,255 -done --bc_arrange_probe
bc_arrange_probe : -skip ${1=50%}
  -ap[0-7] "-r $1,$1,100%,100%"
  -montage[0-7] HHV0:1:V2:3:HV4:5:V6:7

#@gmic bc_arrange_acht : _size(50%), _prefix, _postfix, _a1, ... , _a8
#@gmic : Arrange list of eight images 0-7 as BC Probe (2 per column)
#@gmic : File names are build by _prefix+_a1|..|a8+_postfix
#@gmic : _a1 .. _a8 might contain wildcards, but only one image might bea dressed
#@gmic : with resize by _size (default 50%)
bc_arrange_acht :  -skip "${1=50%} ${2=} ${3=} ${4=A1} ${5=A2} ${6=B1} ${7=B2} ${8=C1} ${9=C2} ${10=D1} ${11=D2}"
   -v - $=pp no=0
  -repeat 8 nsi={$>+4}
    sni=${pp$nsi} ni=${2}${sni}${3}
    nn=${-files\ 3,$ni}
	-if {narg($nn)==1} -i $nn -r. $1,$1,100%,100% 
	  -strcontains $nn,_ok ok=${}
	  -strcontains $nn,_triangle tria=${}
	  -if {$ok} -strreplace $nn,_triangle_ok.tif, 
	  -elif {$tria} -strreplace $nn,_triangle.tif, 
	  -else -strreplace $nn,.pgm, -endif
	  nn1=${}
	  -v + -e[] "-fh_ue_test "$nn1".pgm" -v - 
	  -if {$no==0} _acht_liste=$nn1 -else _acht_liste=$_acht_liste,$nn1 -endif 
	  no+=1
	-elif  {narg($nn)>1} -warn[] 1,"Par. "$nsi" is wrong! More than one file!" 
	  19200,6720 -r. $1,$1,100%,100%
	-else 19200,6720 -r. $1,$1,100%,100% -endif
  -done -montage[0-7] HHV0:1:V2:3:HV4:5:V6:7 -u $_acht_liste -v +

#@gmic bc_call_acht : 
#@gmic : To be called directly after -bc_arrange_acht
#@gmic : which creates a list of file names in var _acht_liste
bc_call_acht : -v -
  -do -alert fh_ue_test,Select,Cancel,$_acht_liste 
    no=${} -if {$no>0} _nn=${-arg\ $no,$_acht_liste} -fh_ue_test $_nn".pgm" -endif 
  -while $no -v +

#@gmic fm_arrange_acht : _size(50%), _prefix, _postfix, _a1, ... , _a8
#@gmic : Arrange list of eight images 0-7 as FM Probe (2 per column)
#@gmic : File names are build by _prefix+_a1|..|a8+_postfix
#@gmic : _a1 .. _a8 might contain wildcards, but only one image might bea dressed
#@gmic : with resize by _size (default 50%)
fm_arrange_acht :  -skip "${1=50%} ${2=} ${3=} ${4=IA*} ${5=IA*} ${6=IB*} ${7=IB*} ${8=IC*} ${9=IC*} ${10=ID*} ${11=ID*}"
   -v - $=pp
  -repeat 8 nsi={$>+4}
    sni=${pp$nsi} ni=${2}${sni}${3}
    nn=${-files\ 3,$ni}
	-if {narg($nn)==1} -i $nn -r. $1,$1,100%,100% -v + -e[] $nn -v -
	-elif  {narg($nn)>1} -warn[] 1,"Par. "$nsi"="$sni" is wrong! More than one file!" 
	  19200,6720 -r. $1,$1,100%,100%
	-else 19200,6720 -r. $1,$1,100%,100% -endif
  -done -montage[0-7] HHV1:0:V3:2:HV5:4:V7:6 -v +

#@gmic fm_arrange_probe : _size(50%)
#@gmic : Arrange list of eight images 0-7 as FM Probe (2 colums roman)
#@gmic : with resize by _size (default 50%)
#@gmic : Ex.: -repeat 8 256,128 -text[-1] $>,10,10,114,1,255 -done --fm_arrange_probe
fm_arrange_probe : -skip ${1=50%}
  -ap[0-7] "-r $1,$1,100%,100%"
  -montage[0-7] HHV1:0:V3:2:HV5:4:V7:6

#@gmic ls_hist : _pattern(*.pgm) : _lowvalue(0) : _highvalue(255)
#@gmic : Generate histograms 
#@gmic : Ex.: -ls_hist ,,49
ls_hist :
-skip ${1=*.pgm},${2=0},${3=255}
nn=${-files\ 3,$1}
-repeat {narg($nn)} -arg {$>+1},$nn -i ${} -histogram. {$3-$2+1},$2,$3 -done -a c

#@gmic :: BAM Particle Utilities

#@gmic bc_partikel : _classes(250),_maxfreq(0),_plot_type(3),_cleaning(),_minA(6),_maxA(400),_log(1)
#@gmic : Input binary images (masks)
#@gmic : Prepares a histogram of particle areas between 1 and _classes pixels
#@gmic : If _maxfreq>0 the histograms are cut.
#@gmic : _plot_type 0-3 (see -plot)
#@gmic : _cleaning/_minA/_maxA only with pink installed (linux/Mac/MinGW)
#@gmic :   e.g. -bc_particle ,,,pink,,,0
#@gmic : _log=1 default logarithmieren
#@gmic : Ex.: gmic DFZ9_IC_m_triangle_ok.tif -channels 0 -bc_partikel 400,,0,,,,0
bc_partikel : 
  -skip "${1=250} ${2=0} ${3=3} ${4=} ${5=6} ${6=400} ${7=1}"
  -e "Produce particle histogram from image$?" -v -
  -if {'"$4"'=='pink'} -repeat $! -l[$>]
    --pink. pink.labelsieve1.sh,$5 -gt. 0
	-pink.. pink.labelsieve.sh,$6 -gt.. 0 -and -nm clean_$> -endl -done 
  -endif
  -ap "-label -histogram {iM},1,{iM} --ge $5 -* -histogram $1,1,$1"
  -if {$2} -c 0,$2 -endif
  -a c 
  -if {$7>0} -+ 1 -log10 -endif 
  -if {$7>=0&&$3>=0} -plot $3 -endif -v +

#@gmic _bc_partikel_fold : _Mean(30),_SD(5)
#@gmic : Use singe cell dist for multi-cell dist 
#@gmic : _mean single cell area
#@gmic : _SD sngle cell
#@gmic : Ex.: gmic DFZ9_IC_m_triangle_ok.tif -channels 0 -bc_partikel 400,,0,,,,0 -bc_partikel_fold 40,8 -plot
_bc_partikel_fold :
  -skip "${1=30} ${2=5}" -v -
  -repeat $! -l[$>]
    me=$1 n=1  
    -do [0] -gaussian. {$2*$n} -/. {iM} -*. {i(#0,$1*$n)} -shift. {$1*$n-w/2} n={$n+1} 
	-while {$1*($n-1)<w} -a c
  -endl -done -v +

#@gmic bc_partikel_folds : _Mean(30),_SD(5)
#@gmic : Use singe cell dist for multi-cell dist 
#@gmic : _mean single cell area
#@gmic : _SD sngle cell
#@gmic : in Partikelverteilung
#@gmic : Ex.: gmic DFZ9_IC_m_triangle_ok.tif -channels 0 -bc_partikel 400,,0,,,,0 -bc_partikel_fold 40,8 -plot
bc_partikel_folds :
  -skip "${1=30} ${2=5}" -v - -u 0
  -repeat $! -l[$>]
    me=$1 n=1 [0] cc={round((i(round($1))+i(round($1-1))+i(round($1+1)))/3)}
    -do -if {$cc>=1}
	  --gaussian. {$2*$n} -*. {if($cc<0,0,$cc)} -shift. {$1*$n-w/2} -round. -u ${},{_is*$n}  
	  --[-2] [-1] -rv[-1,-2] 
#--a[0,-1] c -plot. -rm. 
#-echo_stdout $n,{_$1*$n},{_$2*$n},{_$cc},{_is#-2},${}
	  -else -u ${},0 -endif n={$n+1} 
	  cc={round((i($1*$n)+i(($1-1)*$n)+i(($1+1)*$n))/3)} 
	  cc={if($cc<1,0,$cc)}
	-while {$1*($n-1)<w} -a c
  -endl -done -v +

#@gmic bc_partikel_test : _lowA(1), _highA({w})
#@gmic : _lowA minimale Zellflaeche
#@gmic : _highA maximale Zellflaeche
#@gmic : in Partikelverteilung
#@gmic : out Partikelverteilung,Schaetzung,Residuum
#@gmic : print lowA, highA, meanA, sdA, totalA>=lowA, totalNin, totalA/meanA, totalNest
bc_partikel_test : 
  -skip ${1=1} -skip ${2=w} -check "$1<=$2" -v -
  --f. 'if(x>=$1,x+1,0)' -*. [-2] _A={is} -rm. _B={is} 
  -bc_partikel_feat $1,$2 _C=${} -rm. -bc_partikel_folds $_C (${}) _D={is} -rm. 
#  -plot 
  -echo_stdout[] $_C,$_A,$_B,{round($_A/arg(1,$_C))},$_D -v +

#@gmic bc_partikel_test1 : _meanA(25), _sdA(10)
#@gmic : _meanA mittlere Zellflaeche
#@gmic : _sdA SD Zellflaeche
#@gmic : in Partikelverteilung
#@gmic : out Partikelverteilung,Schaetzung,Residuum
#@gmic : print totalA>=meanA-2*sdA, totalNin, totalA/meanA, totalNest
bc_partikel_test1 : 
  -skip ${1=25} -skip ${2=10} -v -
  --f. 'if(x>=($1-2*$2),x+1,0)' -*. [-2] _A={is} -rm. _B={is} 
  -bc_partikel_folds $1,$2 (${}) _D={is} -rm. 
#  -plot 
  -echo_stdout[] $_A,$_B,{round($_A/$1)},$_D -v +

#@gmic bc_partikel_print : 
#@gmic : Print distribution on stdout 
#@gmic : Ex.: gmic DFZ9_IC_m_triangle_ok.tif -channels 0 -bc_partikel 400,,0,,,,0 -bc_partikel_print -rm 
bc_partikel_print : 
  -v - -l. -repeat {w}
    -echo_stdout {$>+1},{i($>)}
  -done -endl -v +

#@gmic bc_partikel_feat : _low(1), _high({w})
#@gmic : Calculate mean and sd from an interval 
#@gmic : in histogram from bc_partikel
#@gmic : out histogram in
#@gmic : out histogram interval
#@gmic : Ex.: gmic DFZ9_IC_m_triangle_ok.tif -channels 0 -bc_partikel 400,,0,,,,0 -bc_partikel_print -rm
#@gmic : Ex.: gmic DFZ9_IC_m_triangle_ok.tif -channels 0 -bc_partikel 400,,0,,,,-1 -bc_partikel_feat 9,53 -rm. -e \${} -bc_partikel_folds. \${} -plot 
bc_partikel_feat :
  -skip ${1=1} -skip ${2=w} -check "$1<=$2" -v -
  -l. --f. 'if(x<$1,0,if(x>$2,0,1))' -*. [-2] 
    -hist_feature. ,,,1 mean={_arg(3,${})} sd={_arg(4,${})} -u $mean,$sd 
  -endl -v +

#@gmic :: BAM Ratio Utilities

#@gmic bc_ue_ratio : _channel(0), _width(1280), _height(960), _single(0) 
#@gmic : _channel(0)
#@gmic : _width(1280) for subtiling 
#@gmic : _height(960) for subtiling 
#@gmic : _single(0) if true sequence per overview 
#@gmic : Ratio estimator mean and sd over the scanning sequence of subtiles of an overview image.
#@gmic : Input _ok image(s) will be concatenated if not _single
#@gmic : Output n,1,1,2 1d image with A in channel 0 and RefA in 1
#@gmic : Output n,1,1,2 1d image with A/RefA in channel 0 and sd(A/RefA) in 1
#@gmic : status contains final mean and sd
#@gmic : Ex.: gmic -v - V30_Z3_[A-B][12]_triangle_ok.tif -bc_ue_ratio , -plot.
bc_ue_ratio : -skip "${1=0} ${2=1280} ${3=960} ${4=0}"
  -v - -repeat $! -_bc_ue_ratio_sum[$>] $1,$2,$3 -done 
  -if {$4==0} -a x -endif 
  -repeat {$!} --_bc_ue_ratio[$>] -done 
  -if {$!>2} -a[0-{$!/2-1}] c -a[^0] c -endif -v +

#@gmic bc_ue_ratio_print
#@gmic : Input two image vectors (output from bc_ue_ratio)
#@gmic : Input n,1,1,2 1d image with A in channel 0 and RefA in 1
#@gmic : Input n,1,1,2 1d image with A/RefA in channel 0 and sd(A/RefA) in 1
#@gmic : Ex.: gmic -v - dfz9_ic_m_triangle_ok.tif -bc_ue_ratio , -bc_ue_ratio_print -rm
bc_ue_ratio_print : 
  -v - -repeat {w} 
    -echo_stdout {$>+1},{i(#0,$>,0,0,0)},{i(#0,$>,0,0,1)},{i(#1,$>,0,0,0)},{i(#1,$>,0,0,1)}
  -done -v +

#@gmic ls_bc_ue_ratio : files, _channel(0), _width(1280), _height(960), _single(0) 
#@gmic : file pattern
#@gmic : _channel(0)
#@gmic : _width(1280) for subtiling 
#@gmic : _height(960) for subtiling 
#@gmic : _single(0) if true sequence per overview 
#@gmic : Ratio estimator mean and sd over the scanning sequence of subtiles of an overview image.
#@gmic : Input _ok image(s) file names, will be concatenated if not _single
#@gmic : Output n,1,1,2 1d image with A in channel 0 and RefA in 1
#@gmic : Output n,1,1,2 1d image with A/RefA in channel 0 and sd(A/RefA) in 1
#@gmic : status contains final mean and sd
#@gmic : Ex.: gmic -v - -ls_bc_ue_ratio V30_Z3_\[A-D\]\[12\]_triangle_ok.tif -plot.
ls_bc_ue_ratio : -skip "${2=0} ${3=1280} ${4=960} ${5=0}" -v -
  nn=${-files\ 3,$1}
  -repeat {narg($nn)}
    ni=${-arg\ {$>+1},$nn}
    -echo_stdout {$>+1},$ni
    $ni -_bc_ue_ratio_sum. $2,$3,$4
  -done 
  -if {$5==0} -a x -endif
  -repeat {$!} --_bc_ue_ratio[$>] -done 
  -if {$!>2} -a[0-{$!/2-1}] c -a[^0] c -endif -v +

_bc_ue_ratio_sum : -skip "${1=0} ${2=1280} ${3=960}" -v -
  -l. -sh. $1 -sh.. 2 -*.. [-1] -rm[-1,-2] 
    -split_tiles. {w/$2},{h/$3} -s c
    {$!/3},1,1,2 -nm. sum
      -repeat {($!-1)/3}
        -=[sum] {is#($>*3)},$>,0,0,0 -and[{$>*3+2}] 1 -=[sum] {is#($>*3+2)},$>,0,0,1 
      -done 
    -rm[^sum] -endl -v +

#@gmic _bc_ue_ratio : 
#@gmic : Input n,1,1,2 1d image with A in channel 0 and RefA in 1
#@gmic : Output n,1,1,2 1d image with A/RefA in channel 0 and sd(A/RefA) in 1
#@gmic : status contains final mean and sd of A/RefA
_bc_ue_ratio :
  -v - -l.
  -s[0] c 								# [0]=y, [1]=x
  --cumulate[0,1]							# [2]=sum(y) [3]=sum(x)
  --sqr[0,1] -cumulate[4,5] 				# [4]=sum(y^2) [5]=sum(x^2)
  --f. 'if(i(#3,x)>0,i(#2,x)/i(#3,x),0)' # [6]=r
  --*[0] [1] -cumulate[-1] 				# [7]=sum(x*y) 
  --f. 'if(x>0,1.96*sqrt(x+1)/i(#3,x)*sqrt((i(#4,x)-2*i(#6,x)*i(#7,x)+i(#5,x)*(i(#6,x))^2)/x),0)' 
  -k[-1,-3] -a c
  -u {i(w-1,0,0,0)},{i(w-1,0,0,1)} -endl
  -v +

#@gmic _bc_fi_ratio : _concat(0)
#@gmic : Create sequential mean,sd estimates from feature (list) images (created from ls_bc_ue_eval_p)
#@gmic : Ex.: V3[01]_Z*_*_triangle_ok_eval.cimgz -_bc_fi_ratio 0 V3[23]_Z*_*_triangle_ok_eval.cimgz -_bc_fi_ratio[^0] 0   -a c -plot
_bc_fi_ratio :
  -skip ${1=0} -v -
  -repeat $! -l[$>] -s x -k[1,2] -transpose -rv -a c -endl -done 
  -if {$1==0} -a x -endif
  -repeat $! -_bc_ue_ratio[$>] -done -a c -v +

#@gmic :: BAM Other Utilities

#@gmic bc_clean : _maxArea(400), _dilatR(15), _minArea(6),_maxReject(65%),_width(1280),_height(960),_revers(0)
#@gmic : Cleaning by area producing an image to store in ..._ok.tif file
#@gmic : _maxArea in px
#@gmic : _dilatR Enlargement of empty zone around large objects by dilation
#@gmic : _minArea in px
#@gmic : _maxReject if reject area greater than reject whole sub image either in percent or as ratio
#@gmic : _width for subtiling 
#@gmic : _height for subtiling 
#@gmic : _revers red and green mask if 1=true (0=false)
bc_clean : -skip ${1=400},${2=15},${3=6},${4=65%},${5=1280},${6=960},${7=0} 
  -check "$5>0 && $6>0" -v - _na={n} ww={w} hh={h}
  -l. -s c -if $7 -rv[-3,-2] -endif 
    ok={{-2,iM}>=1} val={{-1,is}>0} 
    -l.. --n 0,255 
	  -pink. segmentarea,4,$1 -if {im<iM} -pink. dilatball,$2 -eq. 0 -*.. [-1] -endif
	  --pink.. segmentarea,4,$3 -endl
	-if {$val!=0} -neq. 0 -*... [-1] -endif
	-rm. -rv[-1,-2] -rm... -neq 0 -*... [-1] -if $7 -rv[-3,-2] -endif -a c
	-if {$4>0} -l.
	  -sh. 2,2 --split_tiles. {$ww/$5},{$hh/$6} 
	  -ap[^0,1] "-if {ia<"$4"} -f. 0 -endif"
	  -append_tiles[^0,1] {$ww/$5},{$hh/$6} -*[-1,-2] -rm. 
	-endl -endif
  -endl  -nm $_na -v +

#@gmic bc_clean_new : _maxArea(400), _dilatR(15), _minArea(6),_maxReject(65%),_width(1280),_height(960)
#@gmic : Cleaning by area in channel 0 and 1 producing an image to store in ..._ok.tif file
#@gmic : _maxArea in px
#@gmic : _dilatR Enlargement of empty zone around large objects by dilation
#@gmic : _minArea in px
#@gmic : _maxReject if reject area greater than reject whole sub image either in percent or as ratio
#@gmic : _width for subtiling 
#@gmic : _height for subtiling 
bc_clean_new : -skip ${1=400},${2=15},${3=6},${4=65%},${5=1280},${6=960} 
  -check "$1>=0 && $2>0 && $3>=0 && $4>=0 && $5>0 && $6>0" -v - _na={n} ww={w} hh={h} 
  -l. -s c ok={iM#-3==1} val={is>0} 
# ok=1 if mask from ok image
# val=1 if validity mask is not zero
	-if {$val==0} -f. 1 -endif	# fill with 1 if reference mask is zero
	-if {$1>0} 	#delete large objects
	  --neq[-2,-3] 0
	  -ap[-2,-1] "-label_fg 0,0 --histogram. {iM+1},0,{iM} -=. 0,0 -gt. $1 -map.. [-1] -rm. " -or[-1,-2]
	  -if {im<iM} # any large objects found
	    -n. 0,255 -pink. dilatball,$2 -eq. 0 -*[-4--2] [-1] -rm.
#	    -if {$val!=0} -neq. 0 -*[-2] [-1] -rm. -else -rm.. -endif
	  -else -rm. -endif
	-endif 
	-if {$3>0} -ap[-2,-3] "-label_fg 0,0 --histogram. {iM+1},0,{iM} -=. 0,0 -ge. $3 -map.. [-1] -rm. " -endif 	#delete small objects
 	-if {is==0} -f. 1 -endif 	#if validity mask still zero
	-a c 
	-if {$4>0} -l. 	#delete subimage validity mask if area smaller _maxReject
	  -sh. 2 --split_tiles. {$ww/$5},{$hh/$6} 
	  -ap[^0,1] "--and 1 -if {ia<"$4"} -f.. 0 -endif -rm. "
	  -append_tiles[^0,1] {$ww/$5},{$hh/$6} -f.. 1 -*[-1,-2] -rm. 
	-endl -endif
  -endl -nm. ${_na} -v +

#@gmic bc_clean_new_1 : _maxArea(400), _dilatR(15), _minArea(6),_maxReject(65%),_width(1280),_height(960)
#@gmic : Cleaning by area in channel 0 and 1 producing an image to store in ..._ok.tif file
#@gmic : _maxArea in px
#@gmic : _dilatR Enlargement of empty zone around large objects by dilation
#@gmic : _minArea in px
#@gmic : _maxReject if reject area greater than reject whole sub image either in percent or as ratio
#@gmic : _width for subtiling 
#@gmic : _height for subtiling 
bc_clean_new_1 : -skip ${1=400},${2=15},${3=6},${4=65%},${5=1280},${6=960} 
  -check "$1>=0 && $2>0 && $3>=0 && $4>=0 && $5>0 && $6>0" -v - _na={n} ww={w} hh={h} 
  -l. ok={iM==1} -s c val={is>0} 
# ok=1 if mask from ok image
# val=1 if validity mask is not zero
	-if {$val==0} -f. 1 -endif	# fill with 1 if reference mask is zero
	-if {$1>0} 	#delete large objects
	  --neq[-2,-3] 0
	  -ap[-2,-1] "-label_fg 0,0 --histogram. {iM+1},0,{iM} -=. 0,0 -gt. $1 -map.. [-1] -rm. " -or[-1,-2]
	  -if {im<iM} # any large objects found
	    -n. 0,255 
#		------nur in Unterbildern machen !!! um Randeffekte zu vermeiden
		-l. -split_tiles {$ww/$5},{$hh/$6} 
		  -repeat $! -pink[$>] dilatball,$2 -done
		-append_tiles {$ww/$5},{$hh/$6} -endl 
#		------nur in Unterbildern machen !!! um Randeffekte zu vermeiden
		-eq. 0 -*[-4--2] [-1] -rm.
#	    -if {$val!=0} -neq. 0 -*[-2] [-1] -rm. -else -rm.. -endif
	  -else -rm. -endif
	-endif 
	-if {$3>0} -ap[-2,-3] "-label_fg 0,0 --histogram. {iM+1},0,{iM} -=. 0,0 -ge. $3 -map.. [-1] -rm. " -endif 	#delete small objects
 	-if {is==0} -f. 1 -endif 	#if validity mask still zero
	-a c 
	-if {$4>0} -l. 	#delete subimage validity mask if area smaller _maxReject
	  -sh. 2 --split_tiles. {$ww/$5},{$hh/$6} 
	  -ap[^0,1] "--and 1 -if {ia<"$4"} -f.. 0 -endif -rm. "
	  -append_tiles[^0,1] {$ww/$5},{$hh/$6} -f.. 1 -*[-1,-2] -rm. 
	-endl -endif
  -endl -nm. ${_na} -v +
#@gmic apply_files : "command","filename_pattern",_output_prefix,_output_extension,_view_window={ 0 | 1 }
#@gmic : Apply specified command on all specified image files, by reading them one by one,
#@gmic : and save result by appending 'output_prefix' to each original filename.
#@gmic : If 'output_extension' is set, the output files are written using the specified extension instead of keeping
#@gmic : the original one.
#@gmic : Default value: 'output_prefix=gmic_', 'output_extension=""' and 'view_window=0'.
apply_files : -skip "${3=gmic_}","${4=}",${5=0}
-v -
files=${"-files \"$2\""} -arg2var _file,$files nb_files=${}
({'$files'}) -if {w>128} -z. 0,127 s_files={t}... -else s_files=$files -endif -rm.
-m "_apply_files : $1"
-v + -e[^-1] "Apply command '$1' on files '"$s_files"' and save result with prefix '$3'.\n" -v -
-repeat $nb_files -l[]
file=${_file{$>+1}}
_file=${-basename\ $file}
-if {narg("$4")} 0 -nm. $_file output_file="$3"{b}."$4" -rm. -else output_file="$3"$_file -endif
-v + -e[] "\r - Image "{1+$>}/$nb_files" ["$_file"] -> ["$output_file"]                    " -v -
$file -_apply_files
-o $output_file
-if $5 -w. ${-fitscreen\ {w},{h},{d}},1,0,-1,-1,$_file -endif
-rm
-onfail -v + -e[] "\n - Error occured on file '"$file"'.\n" -v -
-endl -done -uncommand _apply_files -v +
